# Supplementary material for: What makes audiences resilient to disinformation? Integrating micro, meso, and macro factors based on a systematic literature review
Source: publisher site journal article supplement (doi:10.1515/commun-2023-0078), 2024-05-15
Supplement: Supplementary file 1 [file Kont_Appendix.docx]

| Appendix A  Data extraction sheet excerpt  *Table A1: Data extraction sheet excerpt.* | | | | | | | | | |
| --- | --- | --- | --- | --- | --- | --- | --- | --- | --- |
| Author, year | Topic | Field of study | Location | Theory/ concept | Study design | Research instrument | Sample | Key measures | Result |
| Adam-Troian et al., 2021 | Correlation between culture and CT belief | Psychology | United Arab Emirates, Switzerland, USA, France, Germany, Belgium, Poland, Croatia, Slovakia, UK, Turkey, Norway, Macedonia, Czech Republic, Spain, Netherlands, Italy, Hungary, Brazil, Iceland | Cultural dimensions | Quantitative, survey, partly interviews, partly online | Conspiracy Mentality Questionnaire (CMQ),  Generic Conspiracist Beliefs Scale,  Hofstede Cultural Values Scale | Study 1: *N*=25 (average scores from each national sample), not representative, sample size too small  Study 2a: *N*=12,255, 18 countries, representative  Study 2b: *N*=30,994, 18 countries  Study 3: *N*=350, USA, Amazon Mturk, convenience sample | Study 1:  CT belief: 1–5 item, dis/agree  Culture: Hofstede culture score  Study 2a:  Data from 2008 World Public Opinion Poll  CT belief: 1 item only, belief in 9/11 CT, open-ended question  Culture: Hofstede culture score  Study 2b:  CT belief: 5 items, 1–11, un/likely  Culture: Hofstede culture score  Study 3:  Conspiracy mentality: 5 items, 1–11, un/likely  Generic conspiracist belief scale: 15 items, 1–5, un/true  Specific CT belief: 8 item, 1–7, un/likely  Culture: Hofstede scale  Political ideology: 2 items, 1–7, conservative/liberal | Masculinity and Collectivism correlated with CT belief. |
| Author, year | Topic | Field of study | Location | Theory/ concept | Study Design | Research Instrument | Sample | Key measures | Result |
| Ahmed, 2021 | Correlation between cognitive reflection and belief in deepfakes | Communication | Singapore | – | Quantitative, survey, experiment | CRT (cognitive reflection) | *N*=440, USA, Qualtrics, non-representative | Stimulus: deepfake of Kim Kardashian, one with original caption, stating it as artwork, one without  Perceived accuracy of deepfake: 1 item, 1–4, not/accurate  Sharing intention: 1 item, 1–4, not/likely  Cognitive reflection: 3 items  Demographics | 1. Deepfake without caption was more believed by all  2. Instagram caption had influence on accuracy ratings of high (making them more skeptical) but not low CRT individuals |
| Allington et al., 2021 | Covid-19: Correlation between social media use (for Covid information) and belief in Covid CT belief | Digital Humanities Psychology | UK | – | Quantitative, survey, online | – | Study 2: *N*=2250, UK, Ipsos-Mori, representative  Study 3: *N*=2254, UK, Ipsos-Mori, representative | Study 2 Covid conspiracy belief: 1 item, lab theory, true/false  Health protective behaviors: 5 items, yes/no  Social media use for Covid information: 1 item, 1–7, frequency  Study 3  Covid conspiracy belief: 5 items, yes/no  Social media use for information: 7 items, 1–7, nothing/much | 1. Small negative correlation between legacy media use for Covid info & Covid CT belief  2. Strong positive correlation between social media use & Covid CT belief  3. Small positive correlation between use of friends and family for information & Covid CT belief  4. Younger respondents more likely to hold Covid CT belief but most likely mediated by social media use |
| Author, year | Topic | Field of study | Location | Theory/ concept | Study design | Research instrument | Sample | Key measures | Result |
| Amazeen and Bucy, 2019 | Political disinformation: Correlation between news knowledge and belief in political disinformation | Communication | USA | Persuasion knowledge model,  Inoculation theory | Quantitative, survey, online | – | Study 1: *N*=770, USA, Survey Sampling International  Study 2: *N*=1067, ProdegeMR | Stimulus: native ad, 1 political, 1 non-political taken from NYTimes  Procedural news knowledge: multiple choice test, 10 questions  Recognition of native advertising: 2 items, one closed, one open question.  Perceived accuracy of news headlines: 10 items (5 true,5 false political headlines), 1–4, not/accurate  Perceived threat: 1 item, 'idea of encountering native ads in future', 6 bipolar adjective pairs (most negative), 1–7.  Counterarguing: open-ended, listing up five questions of what participants were thinking while viewing native ad.  Persuasion: different items (unclear) regarding share of article on social media and purchase intentions, 1–7, un/likely  Demographics,  Frequency of news consumption Perceived credibility of NYTimes | Validity questionable.  1. Greater levels of Procedural news knowledge correlated with better discernment of false political headlines and recognizing native ads |
| Author, year | Topic | Field of study | Location | Theory/ concept | Study design | Research instrument | Sample | Key measures | Result |
| Anspach and Carlson, 2020 | Influence of social media comments on belief in disinformation | Political Science | USA | – | Quantitative, survey, experiment |  | *N*=954, USA, Amazon Mturk, non-representative | Stimulus: headline about Trump's approval rating  Trustworthiness of source and information  Belief in disinformation  Motivated reasoning  (Items not described in detail) | When exposed to opposing pieces of information, social media audiences are much more likely to cite the (mis)information communicated in the comments as more accurate than the information contained within the article previews |
| Anthony and Moulding, 2019 | Political disinformation: Correlation between different factors and belief in political disinformation | Psychology | Australia | – | Quantitative, survey, online | World Assumptions Scale (WAS),  Dean's Alienation Scale (DAS),  Dangerous Worldview Scale (DWS),  Belief in Conspiracy Theories Inventory (BCTI),  Oxford-Liverpool Inventory of Feelings and Experiences(OLIFE),  Belief in News Inventory (BNI),  Political Identity Scale (PIS),  Left–Right Scale (LRS),  Libertarian- Authoritarian Scale (LAS) | *N*=125, USA, Prolific, non-representative | World assumptions: not further specified  Alienation: 24 items  Dangerous worldview: 10 items  CT belief: 15 items (specific CTs)  Unusual experiences: 12 items (magic thinking, odd beliefs), 1–5, dis/agree  Disinformation belief: 30 items, (pro Trump/pro Clinton, fictitious CT, 1–9, false/true  Political identity: 4 items, 0–100, negative/positive (Democrat/Republican, Clinton/Trump)  General political orientation: left/right, liberal/conservative  Demographics | 1. Conspiratorial views correlated with belief in conspiratorial disinformation  2. Political identity correlated with belief in (conspiratorial) disinformation that is congruent with own viewpoint - motivated reasoning  3. Randomness not correlated with CT belief  4. Normlessness positively related with belief in disinformation |

**Appendix B**

**Identified factors and corresponding studies**

*Table B1: Micro level: identified factors and corresponding studies*

| Deliberation | Pathology | Political ideology | Worldview | Knowledge | Emotions | Media use | Demographics | Perceived control |
| --- | --- | --- | --- | --- | --- | --- | --- | --- |
| Bago et al., 2020  Barron et al., 2018  Bronstein et al., 2019  Buchanan and Kempley, 2021  Calvillo et al., 2020  Enders and Smallpage, 2019  Garrett and Weeks, 2017  Georgiou et al., 2019  Hart and Graether, 2018  Marques et al., 2022  Martel et al., 2020  Martire et al., 2020  Nurse et al., 2022  Pennycook and Rand, 2019, 2020  Pennycook et al., 2018, 2020  Sanchez and Dunning, 2021  Ståhl and van Prooijen, 2018  Stanley et al., 2021  Tandoc et al., 2021  van Prooijen et al., 2018 | Anthony and Moulding, 2019  Barron et al., 2018  Bronstein et al., 2019  Buchanan and Kempley, 2021  Cichocka et al., 2016  Georgiou et al., 2019  Hart and Graether, 2018  Hollander, 2018  Imhoff and Lamberty, 2018  Kuhn et al., 2021  van der Linden et al., 2020  van Prooijen et al., 2015 | Anthony and Moulding, 2019  Bae, 2020  Blom, 2021  Calvillo et al., 2020  Faragó et al., 2020  Furnham, 2021  Green and Douglas, 2018  Hollander, 2018  Hopp et al., 2020  Lawson and Kakkar, 2021  Lobato et al., 2020  Pantazi et al., 2021  Rossini et al., 2021  Ståhl and van Prooijen, 2018  Tandoc et al., 2021  Traberg and van der Linden, 2022  van der Linden et al., 2020  van Prooijen et al., 2015  Vegetti and Mancosu, 2020 | Anthony and Moulding, 2019  Douglas et al., 2016  Enders and Smallpage, 2019  Garrett and Weeks, 2017  Georgiou et al., 2020  Jasinskaja-Lahti and Jetten, 2019  Lobato et al., 2020  MacFarlane et al., 2021  Marchlewska et al., 2019  Marques et al., 2022  Na et al., 2018  Šrol et al., 2021  Ståhl and van Prooijen, 2018  Su, 2021  Swami et al., 2016 | Amazeen and Bucy, 2019  Blom, 2021  Bowyer and Kahne, 2019  Buchanan, 2020  Calvillo et al., 2020  Gerosa et al., 2021  Grebe and Nattrass, 2012  Oh and Lee, 2019  Pennycook et al., 2020  Pickles et al., 2021  Rossini et al., 2021  Vegetti and Mancosu, 2020  Wang et al.,2020  Weeks, 2015  Zimmermann and Kohring, 2020 | Federico et al., 2018  Georgiou et al., 2020  Graeupner and Coman, 2017  Grebe and Nattrass, 2012  Jolley et al., 2018  Kofta et al., 2020  Na et al., 2018  Oh and Lee, 2019  Poon et al., 2020  Sanchez and Dunning, 2021  Šrol et al., 2021  Swami et al., 2016  van Prooijen et al., 2022  Weeks, 2015  Yu et al., 2021 | Ahmed, 2021  Allington et al., 2021  Bae, 2020  Buchanan and Kempley, 2021  Effron and Raj, 2020  Enders et al., 2021  Hollander, 2018  MacFarlane et al., 2021  Neyazi and Muhtadi, 2021  Nisbet and Kamenchuk, 2021  Rossini et al., 2021  Su, 2021  Tandoc et al., 2021 | Allington et al., 2020  Douglas et al., 2016  Georgiou et al., 2020  Gerosa et al., 2021  Grebe and Nattrass, 2012  Kuhn et al., 2021  Marchlewska et al., 2019  Marques et al., 2022  Pickles et al., 2021  Rossini et al., 2021  Swami et al., 2016  van Prooijen, 2017 | Hart and Graether, 2018  Imhoff and Lamberty, 2018  Kofta et al., 2020  Šrol et al., 2021  van Prooijen, 2017 |

Table B2: Meso and macro level: identified factors and corresponding studies.

| Trust & social environment | Culture & collective narcissism | Socio-political & informational environment |
| --- | --- | --- |
| Anspach and Carlson, 2020  Colliander, 2019  Green and Douglas, 2018  Hollander, 2018  Hopp et al., 2020  Jasinskaja-Lahti and Jetten, 2019  Marques et al., 2022  Pickles et al., 2021  Šrol et al., 2021  Wang et al., 2020  Zimmermann and Kohring, 2020 | Adam-Troian et al., 2021  Cichocka et al., 2016  Lin et al., 2021  Marchlewska et al., 2019  van Prooijen and Song, 2021 | Humprecht et al., 2020  Humprecht et al., 2021 |

**Appendix C**

**Study design overview of included articles**

Table C1: Study designs of included articles.

|  | Number of articles | Percentages |
| --- | --- | --- |
| Using existing theories | 33 | 35% |
| Not theory based | 62 | 65% |
|  |  |  |
| Quantitative method | 94 | 99% |
| Mixed/qualitative method | 1 | 1% |
|  |  |  |
| Experimental design | 30 | 32% |
| Non-experimental design | 65 | 68% |
|  |  |  |
| Crowdsourced sample | 71 | 75% |
| Other sampling methods | 24 | 25% |

**Appendix D**

**Articles included in the systematic review**

Adam‐Troian, J., Wagner‐Egger, P., Motyl, M., Arciszewski, T., Imhoff, R., Zimmer, F., Klein, O., Babinska, M., Bangerter, A., Bilewicz, M., Blanuša, N., Bovan, K., Bužarovska, R., Cichocka, A., Çelebi, E., Delouvée, S., Douglas, K. M., Dyrendal, A., Gjoneska, B., … Prooijen, J. W. (2020). Investigating the links between cultural values and belief in conspiracy theories: The key roles of collectivism and masculinity. *Political Psychology, 42*(1), 597–618. https://doi.org/10.1111/pops.12716

Ahmed, S. (2021a). Fooled by the fakes: Cognitive differences in perceived claim accuracy and sharing intention of non-political deepfakes. *Personality and Individual Differences*, *182,* 1–4. https://doi.org/10.1016/j.paid.2021.111074

Ahmed, S. (2021b). Who inadvertently shares deepfakes? Analyzing the role of political interest, cognitive ability, and social network size. *Telematics & Informatics*, *57,* 1–10. https://doi.org/10.1016/j.tele.2020.101508

Allington, D., Duffy, B., Wessely, S., Dhavan, N., & Rubin, J. (2021). Health-protective behaviour, social media usage and conspiracy belief during the COVID-19 public health emergency. *Psychological Medicine*, *51*(10), 1763–1769. https://doi.org/10.1017/S003329172000224X

Amazeen, M. A., & Bucy, E. P. (2019). Conferring resistance to digital disinformation: The inoculating influence of procedural news knowledge. *Journal of Broadcasting & Electronic Media*, *63*(3), 415–432. https://doi.org/10.1080/08838151.2019.1653101

Anspach, N. M., & Carlson, T. N. (2020). What to believe? Social media commentary and belief in misinformation. *Political Behavior*, *42*(3), 697–718. https://doi.org/10.1007/s11109–018–9515–z

Anthony, A., & Moulding, R. (2019). Breaking the news: Belief in fake news and conspiracist beliefs. *Australian Journal of Psychology*, *71*(2), 154–162. https://doi.org/10.1111/ajpy.12233

Bae, S. Y. (2020). The social mediation of political rumors: Examining the dynamics in social media and belief in political rumors. *Journalism*, *21*(10), 1522–1538. https://doi.org/10.1177/1464884917722657

Bago, B., D. G., & Pennycook, G. (2020). Fake news, fast and slow: Deliberation reduces belief in false (but not true) news headlines. *Journal of Experimental Psychology: General*, *149*(8), 1608–1613. https://doi.org/10.1037/xge0000729

Barron, D., Furnham, A., Weis, L., Morgan, K. D., Towell, T., & Swami, V. (2018). The relationship between schizotypal facets and conspiracist beliefs via cognitive processes. *Psychiatry Research*, *259*, 15–20. https://doi.org/10.1016/j.psychres.2017.10.001

Blom, R. (2021). Believing false political headlines and discrediting truthful political headlines: The interaction between news source trust and news content expectancy. *Journalism*, *22*(3), 821–837. https://doi.org/10.1177/1464884918765316

Bowyer, B., & Kahne, J. (2019). Motivated circulation: How misinformation and ideological alignment influence the circulation of political content. *International Journal of Communication*, *13*, 5791–5815.

Bronstein, M. V., Pennycook, G., Bear, A., D. G., & Cannon, T. D. (2019). Belief in fake news is associated with delusionality, dogmatism, religious fundamentalism, and reduced analytic thinking. *Journal of Applied Research in Memory and Cognition*, *8*(1), 108–117. https://doi.org/10.1016/j.jarmac.2018.09.005

Buchanan, T. (2020). Why do people spread false information online? The effects of message and viewer characteristics on self-reported likelihood of sharing social media disinformation. *Plos One*, *15*(10), 1–33. https://doi.org/10.1371/journal.pone.0239666

Buchanan, T., & Kempley, J. (2021). Individual differences in sharing false political information on social media: Direct and indirect effects of cognitive-perceptual schizotypy and psychopathy. *Personality and Individual Differences*, *182*, 1–11. https://doi.org/10.1016/j.paid.2021.111071

Calvillo, D. P., Ross, B. J., Garcia, R. J. B., Smelter, T. J., & Rutchick, A. M. (2020). Political ideology predicts perceptions of the threat of COVID-19 (and susceptibility to fake news about it). *Social Psychological and Personality Science*, *11*(8), 1119–1128. https://doi.org/10.1177/1948550620940539

Cichocka, A., Marchlewska, M., & Golec de Zavala, A. (2016). Does self-love or self-hate predict conspiracy beliefs? Narcissism, self-esteem, and the endorsement of conspiracy theories. *Social Psychological and Personality Science*, *7*(2), 157–166. https://doi.org/10.1177/1948550615616170

Cichocka, A., Marchlewska, M., Golec de Zavala, A., & Olechowski, M. (2016). ‘They will not control us’: Ingroup positivity and belief in intergroup conspiracies. *British Journal of Psychology*, *107*(3), 556–576. https://doi.org/10.1111/bjop.12158

Colliander, J. (2019). ‘This is fake news’: Investigating the role of conformity to other users’ views when commenting on and spreading disinformation in social media. *Computers in Human Behavior*, *97*, 202–215. https://doi.org/10.1016/j.chb.2019.03.032

Di Domenico, G., Nunan, D., Sit, J., & Pitardi, V. (2021). Free but fake speech: When giving primacy to the source decreases misinformation sharing on social media. *Psychology & Marketing*, *38*(10), 1700–1711. https://doi.org/10.1002/mar.21479

Douglas, K. M., Sutton, R. M., Callan, M. J., Dawtry, R. J., & Harvey, A. J. (2016). Someone is pulling the strings: Hypersensitive agency detection and belief in conspiracy theories. *Thinking & Reasoning*, *22*(1), 57–77. https://doi.org/10.1080/13546783.2015.1051586

Effron, D. A., & Raj, M. (2020). Misinformation and morality: Encountering fake-news headlines makes them seem less unethical to publish and share. *Psychological Science*, *31*(1), 75–87. https://doi.org/10.1177/0956797619887896

Enders, A. M., & Smallpage, S. M. (2019a). Informational cues, partisan-motivated reasoning, and the manipulation of conspiracy beliefs. *Political Communication*, *36*(1), 83–102. https://doi.org/10.1080/10584609.2018.1493006

Enders, A. M., & Smallpage, S. M. (2019b). Who are conspiracy theorists? A comprehensive approach to explaining conspiracy beliefs. *Social Science Quarterly*, *100*(6), 2017–2032. https://doi.org/10.1111/ssqu.12711

Enders, A. M., Uscinski, J. E., Seelig, M. I., Klofstad, C. A., Wuchty, S., Funchion, J. R., Murthi, M. N., Premaratne, K., & Stoler, J. (2021). The relationship between social media use and beliefs in conspiracy theories and misinformation. *Political Behavior, 45*(2), 781–804. https://doi.org/10.1007/s11109–021–09734–6

Faragó, L., Kende, A., & Krekó, P. (2020). We only believe in news that we doctored ourselves: The connection between partisanship and political fake news. *Social Psychology*, *51*(2), 77–90. https://doi.org/10.1027/1864–9335/a000391

Federico, C. M., Williams, A. L., & Vitriol, J. A. (2018). The role of system identity threat in conspiracy theory endorsement. *European Journal of Social Psychology*, *48*(7), 927–938. https://doi.org/10.1002/ejsp.2495

Furnham, A. (2021). Just world beliefs, personal success and beliefs in conspiracy theories. *Current Psychology: A Journal for Diverse Perspectives on Diverse Psychological Issues, 42*(4), 2636–2642. https://doi.org/10.1007/s12144–021–01576–z

Garrett, R. K., & Weeks, B. E. (2017). Epistemic beliefs’ role in promoting misperceptions and conspiracist ideation. *Plos One*, *12*(9), 1–17. https://doi.org/10.1371/journal.pone.0184733

Georgiou, N., Delfabbro, P., & Balzan, R. (2019). Conspiracy beliefs in the general population: The importance of psychopathology, cognitive style and educational attainment. *Personality and Individual Differences*, *151*, 1–7. https://doi.org/10.1016/j.paid.2019.109521

Georgiou, N., Delfabbro, P., & Balzan, R. (2020). COVID-19-related conspiracy beliefs and their relationship with perceived stress and pre-existing conspiracy beliefs. *Personality and Individual Differences*, *166*, 1–7. https://doi.org/10.1016/j.paid.2020.110201

Gerosa, T., Gui, M., Hargittai, E., & Minh Hao, N. (2021). (Mis)informed during COVID-19: How education level and information sources contribute to knowledge gaps. *International Journal of Communication*, *15*, 2196–2217.

Graeupner, D., & Coman, A. (2017). The dark side of meaning-making: How social exclusion leads to superstitious thinking. *Journal of Experimental Social Psychology*, *69*, 218–222. https://doi.org/10.1016/j.jesp.2016.10.003

Grebe, E., & Nattrass, N. (2012). AIDS conspiracy beliefs and unsafe sex in Cape Town. *AIDS and Behavior*, *16*(3), 761–773. https://doi.org/10.1007/s10461–011–9958–2

Green, R., & Douglas, K. M. (2018). Anxious attachment and belief in conspiracy theories. *Personality and Individual Differences*, *125*, 30–37. https://doi.org/10.1016/j.paid.2017.12.023

Hart, J., & Graether, M. (2018). Something’s going on here: Psychological predictors of belief in conspiracy theories. *Journal of Individual Differences*, *39*(4), 229–237. https://doi.org/10.1027/1614–0001/a000268

Hollander, B. A. (2018). Partisanship, individual differences, and news media exposure as predictors of conspiracy beliefs. *Journalism & Mass Communication Quarterly*, *95*(3), 691–713. https://doi.org/10.1177/1077699017728919

Hopp, T., Ferrucci, P., & Vargo, C. J. (2020). Why do people share ideologically extreme, false, and misleading content on social media? A self-report and trace data-based analysis of countermedia content dissemination on Facebook and Twitter. *Human Communication Research*, *46*(4), 357–384. https://doi.org/10.1093/hcr/hqz022

Hornsey, M. J., Chapman, C., M., r., Alvarez, B., Bentley, S., Salvador Casara, B. G., Crimston, C. R., Ionescu, O., Krug, H., Preya Selvanathan, H., Steffens, N. K., & Jetten, J. (2021). To what extent are conspiracy theorists concerned for self versus others? A covid‐19 test case. *European Journal of Social Psychology*. *51*(2), 285–293. https://doi.org/10.1002/ejsp.2737

Humprecht, E., Esser, F., & Van Aelst, P. (2020). Resilience to online disinformation: a framework for cross-national comparative research. *International Journal of Press/Politics*, *25*(3), 493–516. https://doi.org/10.1177/1940161219900126

Humprecht, E., Esser, F., Aelst, P. V., Staender, A., & Morosoli, S. (2021). The sharing of disinformation in cross-national comparison: Analyzing patterns of resilience. *Information, Communication & Society, 26*(7), 1–21. https://doi.org/10.1080/1369118X.2021.2006744

Imhoff, R., & Lamberty, P. (2018). How paranoid are conspiracy believers? Toward a more fine‐grained understanding of the connect and disconnect between paranoia and belief in conspiracy theories. *European Journal of Social Psychology*, *48*(7), 909–926. https://doi.org/10.1002/ejsp.2494

Imhoff, R., & Lamberty, P. K. (2017). Too special to be duped: Need for uniqueness motivates conspiracy beliefs. *European Journal of Social Psychology*, *47*(6), 724–734. https://doi.org/10.1002/ejsp.2265

Jasinskaja‐Lahti, I., & Jetten, J. (2019). Unpacking the relationship between religiosity and conspiracy beliefs in Australia. *British Journal of Social Psychology*, *58*(4), 938–954. https://doi.org/10.1111/bjso.12314

Jolley, D., Douglas, K. M., & Sutton, R. M. (2018). Blaming a few bad apples to save a threatened barrel: The system‐justifying function of conspiracy theories. *Political Psychology*, *39*(2), 465–478. https://doi.org/10.1111/pops.12404

Klein, C., Clutton, P., & Dunn, A. G. (2019). Pathways to conspiracy: The social and linguistic precursors of involvement in Reddit’s conspiracy theory forum. *Plos One*, *14*(11), 1–23. https://doi.org/10.1371/journal.pone.0225098

Kofta, M., Soral, W., & Bilewicz, M. (2020). What breeds conspiracy antisemitism? The role of political uncontrollability and uncertainty in the belief in Jewish conspiracy. *Journal of Personality and Social Psychology*, *118*(5), 900–918. https://doi.org/10.1037/pspa0000183

Kuhn, S. A. K., Lieb, R., Freeman, D., Andreou, C., & er-Schellenberg, T. (2021). Coronavirus conspiracy beliefs in the german-speaking general population: Endorsement rates and links to reasoning biases and paranoia. *Psychological Medicine*, *52*(16), 1–15. https://doi.org/10.1017/S0033291721001124

Lawson, M. A., & Kakkar, H. (2021). Of pandemics, politics, and personality: The role of conscientiousness and political ideology in the sharing of fake news. *Journal of Experimental Psychology: General, 151*(5), 1154–1177. https://doi.org/10.1037/xge0001120

Lin, Y., Zhang, Y. C., & Oyserman, D. (2021). Seeing meaning even when none may exist: Collectivism increases belief in empty claims. *Journal of Personality and Social Psychology, 22*(3), 351–366. https://doi.org/10.1037/pspa0000280

Linden, S., er, Panagopoulos, C., Azevedo, F., & Jost, J. T. (2020). The paranoid style in american politics revisited: An ideological asymmetry in conspiratorial thinking. *Political Psychology* *, 42*(1), 23–51. https://doi.org/10.1111/pops.12681

Lobato, E. J. C., Powell, M., Padilla, L. M. K., & Holbrook, C. (2020). Factors predicting willingness to share COVID-19 misinformation. *Frontiers in Psychology*, *11,* 1–8. https://doi.org/10.3389/fpsyg.2020.566108

Lyons, B. A., Montgomery, J. M., Guess, A. M., Nyhan, B., & Reifler, J. (2021). Overconfidence in news judgments is associated with false news susceptibility. *PNAS Proceedings of the National Academy of Sciences of the United States of America*, *118*(23), 1–10. https://doi.org/10.1073/pnas.2019527118

MacFarlane, D., Tay, L. Q., Hurlstone, M. J., & Ecker, U. K. H. (2021). Refuting spurious COVID-19 treatment claims reduces demand and misinformation sharing. *Journal of Applied Research in Memory and Cognition*, *10*(2), 248–258. https://doi.org/10.1016/j.jarmac.2020.12.005

Marchlewska, M., Cichocka, A., Łozowski, F., Górska, P., & Winiewski, M. (2019). In search of an imaginary enemy: Catholic collective narcissism and the endorsement of gender conspiracy beliefs. *The Journal of Social Psychology*, *159*(6), 766–779. https://doi.org/10.1080/00224545.2019.1586637

Marchlewska, M., Green, R., Cichocka, A., Molenda, Z., & Douglas, K. M. (2021). From bad to worse: Avoidance coping with stress increases conspiracy beliefs. *British Journal of Social Psychology, 61*(2), 532–549. https://doi.org/10.1111/bjso.12494

Mari, S., Gil de Zúñiga, H., Suerdem, A., Hanke, K., Brown, G., Vilar, R., Boer, D., & Bilewicz, M. (2021). Conspiracy theories and institutional trust: Examining the role of uncertainty avoidance and active social media use. *Political Psychology, 43*(2), 277–296. https://doi.org/10.1111/pops.12754

Marques, M. D., Ling, M., & McLennan, J. (2022). australasian public awareness and belief in conspiracy theories: Motivational correlates. *Political Psychology*, *43*(1), 177–198. https://doi.org/10.1111/pops.12746

Martel, C., Pennycook, G., & , D. G. (2020). Reliance on emotion promotes belief in fake news. *Cognitive Research: Principles and Implications*, *5*(1), 1–20. https://doi.org/10.1186/s41235–020–00252–3

Martinez-Berman, L., McCutcheon, L., & Huynh, H. P. (2020). Is the worship of celebrities associated with resistance to vaccinations? Relationships between celebrity admiration, anti-vaccination attitudes, and beliefs in conspiracy. *Psychology, Health & Medicine, 26*(9), 1063–1072. https://doi.org/10.1080/13548506.2020.1778754

Martire, K. A., Growns, B., Bali, A. S., Montgomery-Farrer, B., Summersby, S., & Younan, M. (2020). Limited not lazy: A quasi-experimental secondary analysis of evidence quality evaluations by those who hold implausible beliefs. *Cognitive Research: Principles and Implications*, *5*(1), 1–15. https://doi.org/10.1186/s41235–020–00264–z

Na, K., Garrett, R. K., & Slater, M. D. (2018). Rumor acceptance during public health crises: Testing the emotional congruence hypothesis. *Journal of Health Communication*, *23*(8), 791–799. https://doi.org/10.1080/10810730.2018.1527877

Neyazi, T. A., & Muhtadi, B. (2021). Selective belief: How partisanship drives belief in misinformation. *International Journal of Communication*, *15*, 1286–1308.

Nisbet, E. C., & Kamenchuk, O. (2021). Russian news media, digital media, informational learned helplessness, and belief in COVID-19 misinformation. *International Journal of Public Opinion Research*, *33*(3), 571–590. https://doi.org/10.1093/ijpor/edab011

Nurse, M. S., Ross, R. M., Isler, O., & Van Rooy, D. (2022). Analytic thinking predicts accuracy ratings and willingness to share covid–19 misinformation in australia. *Memory & Cognition, 50*(2), 425–434. https://doi.org/10.3758/s13421–021–01219–5

O'Brien, T. C., Palmer, R., & Albarracin, D. (2021). Misplaced trust: When trust in science fosters belief in pseudoscience and the benefits of critical evaluation. *Journal of Experimental Social Psychology*, *96*, 1–13. https://doi.org/10.1016/j.jesp.2021.104184

Oh, H. J., & Lee, H. (2019). When do people verify and share health rumors on social media? The effects of message importance, health anxiety, and health literacy. *Journal of Health Communication*, *24*(11), 837–847. https://doi.org/10.1080/10810730.2019.1677824

Pantazi, M., Papaioannou, K., & Prooijen, J. W. (2021). Power to the people: The hidden link between support for direct democracy and belief in conspiracy theories. *Political Psychology, 43*(3), 529–548. https://doi.org/10.1111/pops.12779

Pennycook, G., & Rand, D. G. (2019). Lazy, not biased: Susceptibility to partisan fake news is better explained by lack of reasoning than by motivated reasoning. *Cognition*, *188*, 39–50. https://doi.org/10.1016/j.cognition.2018.06.011

Pennycook, G., & Rand, D. G. (2020). Who falls for fake news? The roles of bullshit receptivity, overclaiming, familiarity, and analytic thinking. *Journal of Personality*, *88*(2), 185–200. https://doi.org/10.1111/jopy.12476

Pennycook, G., Cannon, T. D., & , D. G. (2018). Prior exposure increases perceived accuracy of fake news. *Journal of Experimental Psychology: General*, *147*(12), 1865–1880. https://doi.org/10.1037/xge0000465

Pennycook, G., McPhetres, J., Zhang, Y., Lu, J. G., & , D. G. (2020). Fighting COVID-19 misinformation on social media: Experimental evidence for a scalable accuracy-nudge intervention. *Psychological Science*, *31*(7), 770–780. https://doi.org/10.1177/0956797620939054

Pickles, K., Cvejic, E., Nickel, B., Copp, T., Bonner, C., Leask, J., Ayre, J., Batcup, C., Cornell, S., Dakin, T., Dodd, R. H., Isautier, J. M. J., & McCaffery, K. J. (2021). COVID-19 misinformation trends in Australia: Prospective longitudinal national survey. *Journal of Medical Internet Research*, *23*(1), 1–14. https://doi.org/10.2196/23805

Poon, K.-T., Chen, Z., & Wong, W.-Y. (2020). Beliefs in conspiracy theories following ostracism. *Personality and Social Psychology Bulletin*, *46*(8), 1234–1246. https://doi.org/10.1177/0146167219898944

Rossini, P., Stromer-Galley, J., Baptista, E. A., & Veiga de Oliveira, V. (2021). Dysfunctional information sharing on WhatsApp and Facebook: The role of political talk, cross-cutting exposure and social corrections. *New Media & Society*, *23*(8), 2430–2451. https://doi.org/10.1177/1461444820928059

Sanchez, C., & Dunning, D. (2021). Cognitive and emotional correlates of belief in political misinformation: Who endorses partisan misbeliefs? *Emotion*, *21*(5), 1091–1102. https://doi.org/10.1037/emo0000948

Šrol, J., Ballová Mikušková, E., & Čavojová, V. (2021). When we are worried, what are we thinking? Anxiety, lack of control, and conspiracy beliefs amidst the COVID‐19 pandemic. *Applied Cognitive Psychology*, *35*(3), 720–729. https://doi.org/10.1002/acp.3798

Ståhl, T., & van Prooijen, J.-W. (2018). Epistemic rationality: Skepticism toward unfounded beliefs requires sufficient cognitive ability and motivation to be rational. *Personality and Individual Differences*, *122*, 155–163. https://doi.org/10.1016/j.paid.2017.10.026

Stanley, M. L., Barr, N., Peters, K., & Seli, P. (2021). Analytic-thinking predicts hoax beliefs and helping behaviors in response to the COVID-19 pandemic. *Thinking & Reasoning*, *27*(3), 464–477. https://doi.org/10.1080/13546783.2020.1813806

Su, Y. (2021). It doesn’t take a village to fall for misinformation: Social media use, discussion heterogeneity preference, worry of the virus, faith in scientists, and COVID-19-related misinformation beliefs. *Telematics & Informatics*, *58*, 1–12. https://doi.org/10.1016/j.tele.2020.101547

Swami, V., Furnham, A., Smyth, N., Weis, L., Lay, A., & Clow, A. (2016). Putting the stress on conspiracy theories: Examining associations between psychological stress, anxiety, and belief in conspiracy theories. *Personality and Individual Differences*, *99*, 72–76. https://doi.org/10.1016/j.paid.2016.04.084

Swami, V., Weis, L., Lay, A., Barron, D., & Furnham, A. (2016). Associations between belief in conspiracy theories and the maladaptive personality traits of the personality inventory for DSM-5. *Psychiatry Research*, *236*, 86–90. https://doi.org/10.1016/j.psychres.2015.12.027

Tandoc, E. C., Lee, J., Chew, M., Tan, F. X., & Goh, Z. H. (2021). Falling for fake news: the role of political bias and cognitive ability. *Asian Journal of Communication*, *31*(4), 237–253. https://doi.org/10.1080/01292986.2021.1941149

Traberg, C. S., & van der Linden, S. (2022). Birds of a feather are persuaded together: Perceived source credibility mediates the effect of political bias on misinformation susceptibility. *Personality and Individual Differences*, *185,* 1–15. https://doi.org/10.1016/j.paid.2021.111269

van Prooijen, J.-W., Krouwel, A. P. M., & Pollet, T. V. (2015). Political extremism predicts belief in conspiracy theories. *Social Psychological and Personality Science*, *6*(5), 570–578. https://doi.org/10.1177/1948550614567356

van Prooijen, J. W. (2017). Why education predicts decreased belief in conspiracy theories. *Applied Cognitive Psychology*, *31*(1), 50–58. https://doi.org/10.1002/acp.3301

van Prooijen, J. W., Douglas, K. M., & De Inocencio, C. (2018). Connecting the dots: Illusory pattern perception predicts belief in conspiracies and the supernatural. *European Journal of Social Psychology*, *48*(3), 320–335. https://doi.org/10.1002/ejsp.2331

van Prooijen, J. W., & Song, M. (2021). The cultural dimension of intergroup conspiracy theories. *British Journal of Psychology*, *112*(2), 455–473. https://doi.org/10.1111/bjop.12471

van Prooijen, J. W., Ligthart, J., Rosema, S., & Xu, Y. (2022). The entertainment value of conspiracy

theories. British Journal of Psychology, 113(1), 25–48. https://doi.org/10.1111/bjop.12522

Vegetti, F., & Mancosu, M. (2020). The Impact of Political Sophistication and Motivated Reasoning on Misinformation. *Political Communication*, *37*(5), 678–695. https://doi.org/10.1080/10584609.2020.1744778

Wang, R., He, Y., Xu, J., & Zhang, H. (2020). Fake news or bad news? Toward an emotion-driven cognitive dissonance model of misinformation diffusion. *Asian Journal of Communication*, *30*(5), 317–342. https://doi.org/10.1080/01292986.2020.1811737

Weeks, B. E. (2015). Emotions, partisanship, and misperceptions: How anger and anxiety moderate the effect of partisan bias on susceptibility to political misinformation. *Journal of Communication*, *65*(4), 699–719. https://doi.org/10.1111/jcom.12164

Whitson, J. A., Kim, J., Wang, C. S., Menon, T., & Webster, B. D. (2019). Regulatory focus and conspiratorial perceptions: The importance of personal control. *Personality and Social Psychology Bulletin*, *45*(1), 3–15. https://doi.org/10.1177/0146167218775070

Yu, X., Wojcieszak, M., Lee, S., Casas, A., Azrout, R., & Gackowski, T. (2021). The (null) effects of happiness on affective polarization, conspiracy endorsement, and deep fake recognition: Evidence from five survey experiments in three countries. *Political Behavior, 43*(3), 1265–1287. https://doi.org/10.1007/s11109–021–09701–1

Zimmermann, F., & Kohring, M. (2020). Mistrust, disinforming news, and vote choice: A panel survey on the origins and consequences of believing disinformation in the 2017 German parliamentary election. *Political Communication*, *37*(2), 215–237. https://doi.org/10.1080/10584609.2019.1686095
